# Supplementary material
Source: PubMed Central journal article supplement (PMC3513539)
Supplement: supp_jc.2012-2205v1_JC-12-2205suppaddentab2.pdf [file supp_jc.2012-2205v1_JC-12-2205suppaddentab2.pdf]

## **APPENDIX TABLE LEGENDS**

**Appendix Table 1.** Algorithms for menstrual cycle function parameters.

**Appendix Table 2.** Menstrual cycle function parameters before and after bariatric surgery.

## Appendix Table 1: Algorithms for Menstrual Cycle Function Parameters

Endpoints of menstrual cycle function were derived from daily vaginal bleeding diaries and urinary E<sub>1</sub>3G and Pd3G measurements using previously described algorithms (Kassam et al., 1996; Reutman et al., 2002b; Venners et al., 2006; Rochester et al, 2009). Descriptions do not include algorithm rules for missing data.

### Cycle Length & Bleeding Endpoints

- **Menses (days):** The onset of menses was the first of 2 consecutive days of bleeding, only one of which could be spotting. Menses ended with 3 or more consecutive days of nonbleeding or spotting. Intervening 1-2 day interruptions in bleeding (nonbleeding or spotting) were counted as part of menses (Reutman et al., 2002b).
- **Day of Luteal Transition (DLT) (day):** Index of ovulation when the E<sub>1</sub>3G: Pd3G ratio begins to drop (Baird et al. 1999).
- **Menstrual Cycle Length (days):** Interval from onset of menses to day before onset of next menses.
- **Follicular Phase Length (days):** Interval from onset of menses through DLT.
- **Luteal Phase Length (days):** Menstrual cycle length minus follicular phase length.
- **Luteal Phase Length: Cycle Length (unitless):** Luteal phase length divided by menstrual cycle length.
- **Number of Bleed Days per Menses (days):** Number of days with bleeding during menses.
- **Number of Bleed Days per Interval (days):** Number of days with bleeding during menses plus adjacent bleeding days, allowing 2 day non-bleeding before or after menses.
- **Number of Bleed Days per Cycle (days):** Number of days with bleeding during the menstrual cycle.

### Urinary E<sub>1</sub>3G Endpoints:

- **Early Follicular E<sub>1</sub>3G Level (ng/mg cr):** Arithmetic mean of E<sub>1</sub>3G levels for cycle days 3 through 6.
- **Mid-Follicular E<sub>1</sub>3G Level (ng/mg cr):** Arithmetic mean of E<sub>1</sub>3G levels for cycle day 5 through day 2 before the E<sub>1</sub>3G peak.
- **Onset of Follicular E<sub>1</sub>3G Rise (day):** CUSUM algorithm (Schiphorst et al., 1985).
- **Rate of Follicular E<sub>1</sub>3G Rise (ng/mg cr/day):** Slope of E<sub>1</sub>3G levels for 3 days prior to day of E<sub>1</sub>3G peak.
- **Days from E<sub>1</sub>3G Rise Onset to Ovulation (days):** DLT minus onset of follicular E<sub>1</sub>3G rise.
- **Day of E<sub>1</sub>3G Peak (day):** Day of highest E<sub>1</sub>3G value  $\leq 3$  days from DLT. If no DLT, pick highest E<sub>1</sub>3G value.
- **3-Day Perioviatory E<sub>1</sub>3G Peak Level (ng/mg cr):** Maximum 3-day arithmetic mean of E<sub>1</sub>3G levels that includes the E<sub>1</sub>3G peak.
- **Early Luteal E<sub>1</sub>3G Level (ng/mg cr):** Arithmetic mean of E<sub>1</sub>3G levels for days 1 through 4 after E<sub>1</sub>3G peak.
- **Mid-Luteal E<sub>1</sub>3G Level (ng/mg cr):** Geometric mean of E<sub>1</sub>3G levels for days 5 and 6 after DLT (Baird et al. 1999).
- **Late luteal E<sub>1</sub>3G Level (ng/mg cr):** Arithmetic mean of E<sub>1</sub>3G levels for last 6 days of cycle.
- **15-Day E<sub>1</sub>3G Level (ng/mg cr):** Arithmetic mean of E<sub>1</sub>3G levels for 9 days before through 5 days after DLT (Venners et al., 2006).
- **28-Day E<sub>1</sub>3G Area Under the Curve (ng/mg cr):** Sum of E<sub>1</sub>3G levels for 13 days before through 14 days after DLT (Rochester et al., 2009).

### Urinary Pd3G Endpoints:

- **Ovulatory Cycle (Y/N):** If [Pd3Gi/Pd3G Baseline]  $> 2$  for 3 consecutive days, cycle is ovulatory; if not, cycle is anovulatory. Use Baseline 1; if not calculable, pick lowest among Baselines 2 through 4 (Kassam et al., 1996).
  - Baseline 1 (start and end menses known): Mean of cycle days 6 to 10.
  - Baseline 2 (end menses known or 35 days of sampling): Low 5-day mean.
  - Baseline 3 (end menses known): Mean of cycle days 6 to 10 of subsequent cycle.
  - Baseline 4 (end menses known): Low 5-day mean of days 1 to 14 of subsequent cycle.
- **Pd3G Baseline Level ( $\square$ g/mg cr):** Baseline selected for Anovulatory Cycle algorithm.
- **Early Follicular Pd3G Level ( $\square$ g/mg cr):** Arithmetic mean of Pd3G levels on cycle days 3 through 6.
- **Follicular Pd3G Level ( $\square$ g/mg cr):** Geometric mean of Pd3G levels from cycle day 5 through day 3 before the DLT; if no DLT, use days 6 through 10 (Baird et al. 1999).
- **Days from Ovulation to Pd3G Rise Onset (days):** Day of Pd3G rise onset minus DLT.
- **Day of Pd3G Rise (day):** First day that Pd3G levels rise  $> 3.5$  SD above mean of previous 7 days, with next day above same limit, starting on cycle day 5.
- **Rate of Perioviatory Pd3G Rise ( $\square$ g/mg cr/day):** Slope of Pd3G levels for days 0 through 2 after DLT.
- **Early-Mid Luteal Pd3G Rise ( $\square$ g/mg cr/day):** Slope of Pd3G levels for day 3 after DLT through Pd3G peak.
- **Mid-Luteal Pd3G Level ( $\square$ g/mg cr):** Geometric mean of Pd3G levels for days 5 and 6 after the DLT (Baird et al. 1999).

## Algorithms for menstrual cycle function parameters (continued)

- **Day of Pd3G Peak (day):** Day of highest Pd3G level of cycle.
- **3-Day Pd3G Peak (absolute) ( $\mu\text{g}/\text{mg cr}$ ):** Maximum 3-day arithmetic mean of Pd3G levels that includes the Pd3G peak.
- **3-Day Pd3G Peak (relative) ( $\mu\text{g}/\text{mg cr}$ ):** Maximum 3-day arithmetic mean of Pd3G levels that includes the Pd3G peak minus the Pd3G Baseline Level.
- **Rate of Mid-Late Luteal Pd3G Drop ( $\mu\text{g}/\text{mg cr}/\text{day}$ ):** Slope of Pd3G levels for day of Pd3G peak through end of cycle.
- **Days from Pd3G peak to End of Cycle (days):** Cycle length minus day of Pd3G peak.
- **Luteal Pd3G Area Under the Curve 1 (ovulatory; absolute) ( $\mu\text{g}/\text{mg cr}$ ):** Sum of Pd3G levels for day after DLT through last day of cycle.
- **Luteal Pd3G Area Under the Curve 2 (all cycles; absolute) ( $\mu\text{g}/\text{mg cr}$ ):** Sum of Pd3G levels for day after DLT through last day of cycle, or last 14 days of anovulatory cycles.
- **Luteal Pd3G Area Under the Curve 3 (ovulatory; relative) ( $\mu\text{g}/\text{mg cr}$ ):** Sum of Pd3G levels for day after DLT through last day of cycle minus Pd3G Baseline Level.
- **Luteal Pd3G Area Under the Curve 4 (all cycles; relative) ( $\mu\text{g}/\text{mg cr}$ ):** Sum of Pd3G levels for day after DLT through last day of cycle, or last 14 days of anovulatory cycles, minus Pd3G Baseline Level.
- **Luteal Pd3G Area Under the Curve 5 ( $\mu\text{g}/\text{mg cr}$ ):** Sum of Pd3G levels for 2 days before through 16 days after DLT (Rochester et al., 2009).

### Urinary E<sub>1</sub>3G: Pd3G Endpoints:

As defined above, DLT is an index of the day of ovulation, marked by the drop in the E<sub>1</sub>3G: Pd3G ratio (Baird et al. 1999).

- **E<sub>1</sub>3G: Pd3G Peak Level (unitless):** Value of E<sub>1</sub>3G/ Pd3G on the day before DLT.
- **E<sub>1</sub>3G: Pd3G DLT Level (unitless):** Value of E<sub>1</sub>3G/ Pd3G on the DLT.
- **E<sub>1</sub>3G: Pd3G Descent from Peak (unitless):** 3-day slope of E<sub>1</sub>3G/ Pd3G for 0 through 2 days from peak.
- **E<sub>1</sub>3G: Pd3G Descent from DLT (unitless):** 3-day slope of E<sub>1</sub>3G/ Pd3G for 0 through 2 days from DLT.
- **Steepest E<sub>1</sub>3G: Pd3G Descent (unitless):** Steepest 3-day E<sub>1</sub>3G/ Pd3G slope starting on the DLT or the Peak.
- **Mid-Luteal E<sub>1</sub>3G: Pd3G Level (unitless):** Geometric mean of E<sub>1</sub>3G/ Pd3G on days 5 and 6 after DLT.

### References:

- Baird DD, Weinberg CR, Zhou H, Kamel F, McConnaughey, DR, Kesner JS, Wilcox AJ. Preimplantation urinary hormone profiles and the probability of conception in healthy women. *Fertil Steril* 71:40–9, 1999
- Kassam A, Overstreet JW, Snow-Harter C, De Souza MJ, Gold EB, Lasley BL. Identification of anovulation and transient luteal function using a urinary pregnanediol-3-glucuronide ratio algorithm. *Environ Health Perspect* 104:408-13, 1996
- Reutman SR, Lemasters GK, Kesner JS, Shukla R, Krieg EF Jr, Knecht EA, Lockey JE. Urinary reproductive hormone level differences between African American and Caucasian women of reproductive age. *Fertil Steril* 78:383-91, 2002b
- Rochester D, Jain A, Polotsky AJ, Polotsky H, Gibbs K, Isaac B, Zeitlian G, Hickmon C, Feng S, Santoro N. Partial recovery of luteal function after bariatric surgery in obese women. *Fertil Steril* 92:1410-5, 2009
- Schiphorst LE, Collins WP, Royston JP. An estrogen test to determine the times of potential fertility in women. *Fertil Steril* 44:328-34, 1985
- Venners SA, Liu X, Perry MJ, Korrick SA, Li Z, Yang F, Yang J, Lasley BL, Xu X, Wang X. Urinary estrogen and progesterone metabolite concentrations in menstrual cycles of fertile women with non-conception, early pregnancy loss or clinical pregnancy. *Hum Reprod* 21:2272-80, 2006

**Appendix Table 2.** Menstrual Cycle Function Parameters Before (Baseline) and After Bariatric Surgery (Change from Baseline). Blue shading are significant main effects, yellow shading are significant time effects without significant main effect

| Variable                                        | Main Effect P-value | Pre-surgery | 1 Month Post-Surgery |         | 3 Month Post-Surgery |         | 6 Month Post-Surgery |         | 12 Month Post-Surgery |         | 24 Month Post-Surgery |         |
|-------------------------------------------------|---------------------|-------------|----------------------|---------|----------------------|---------|----------------------|---------|-----------------------|---------|-----------------------|---------|
|                                                 |                     | Mean (SD)   | Estimate (95% CI)    | P-value | Estimate (95% CI)    | P-value | Estimate (95% CI)    | P-value | Estimate (95% CI)     | P-value | Estimate (95% CI)     | P-value |
| <b>General Endpoints</b>                        |                     |             |                      |         |                      |         |                      |         |                       |         |                       |         |
| Cycle length (days)                             | 0.412               | 37.1 (24.5) | -2.5 (-9.4,4.3)      | 0.466   | -2.9 (-8.9,3.1)      | 0.335   | -6.0 (-11.7,-0.3)    | 0.038   | -4.4 (-10.3,1.4)      | 0.138   | -4.1 (-10.6,2.4)      | 0.212   |
| Follicular phase (days)                         | 0.001               | 22.0 (12.5) | -3.2 (-8.4,2.1)      | 0.234   | -6.5 (-10.5,-2.4)    | 0.002   | -8.2 (-12.3,-4.2)    | 0.0002  | -7.9 (-12.1,-3.6)     | 0.0005  | -8.9 (-13.9,-3.9)     | 0.0007  |
| Luteal phase (days)                             | 0.336               | 12.2 (2.4)  | 3.8 (0.4,7.2)        | 0.031   | 0.0 (-2.6,2.6)       | 0.990   | 0.8 (-1.9,3.4)       | 0.569   | 0.8 (-2.0,3.7)        | 0.562   | 0.0 (-3.4,3.4)        | 0.996   |
| Luteal phase:cycle length                       | 0.140               | 0.39 (0.14) | 0.05 (-0.03,0.14)    | 0.218   | 0.06 (-0.01,0.12)    | 0.105   | 0.09 (0.02,0.15)     | 0.012   | 0.09 (0.02,0.16)      | 0.015   | 0.07 (-0.02,0.16)     | 0.103   |
| Bleed days/menses                               | 0.376               | 5.31 (1.49) | 0.36 (-0.50,1.21)    | 0.412   | -0.28 (-1.01,0.46)   | 0.455   | -0.08 (-0.77,0.62)   | 0.827   | 0.26 (-0.45,0.97)     | 0.471   | -0.02 (-0.79,0.76)    | 0.969   |
| Bleed day/interval                              | 0.514               | 5.81 (1.94) | 0.36 (-0.65,1.36)    | 0.486   | -0.26 (-1.12,0.61)   | 0.564   | 0.00 (-0.82,0.82)    | 0.999   | 0.09 (-0.75,0.93)     | 0.837   | -0.41 (-1.33,0.51)    | 0.379   |
| Bleed days/cycle                                | 0.638               | 5.69 (1.83) | 0.67 (-0.59,1.92)    | 0.298   | -0.14 (-1.23,0.96)   | 0.806   | 0.18 (-0.85,1.21)    | 0.732   | 0.25 (-0.81,1.31)     | 0.639   | -0.23 (-1.40,0.94)    | 0.705   |
| <b>E<sub>1</sub>3G Endpoints</b>                |                     |             |                      |         |                      |         |                      |         |                       |         |                       |         |
| Early follicular mean (ng/mg cr)                | 0.178               | 12.8 (7.5)  | -2.4 (-5.6,0.8)      | 0.133   | -2.0 (-4.5,0.5)      | 0.115   | -0.8 (-3.3,1.7)      | 0.512   | 0.1 (-2.4,2.7)        | 0.912   | 0.8 (-2.0,3.6)        | 0.574   |
| Mid follicular mean (ng/mg cr)                  | 0.787               | 19.3 (9.5)  | -3.1 (-11.9,5.7)     | 0.471   | -2.1 (-8.9,4.8)      | 0.537   | -4.6 (-11.9,2.7)     | 0.198   | -2.9 (-10.2,4.5)      | 0.421   | -3.34 (-11.5,4.8)     | 0.401   |
| Onset of follicular rise (day)                  | 0.983               | 11.7 (2.7)  | -0.6 (-3.2,1.9)      | 0.610   | -0.6 (-2.6,1.3)      | 0.516   | -0.3 (-2.5,1.9)      | 0.781   | -0.1 (-2.4,2.1)       | 0.917   | -0.1 (-2.6,2.5)       | 0.967   |
| Follicular rise (ng/mg cr/day)                  | 0.955               | 6.40 (7.71) | -2.59 (-8.22,3.04)   | 0.358   | -0.97 (-5.10,3.16)   | 0.637   | -0.89 (-5.49,3.70)   | 0.696   | -0.90 (-5.47,3.67)    | 0.693   | -2.05 (-8.51,4.40)    | 0.524   |
| E <sub>1</sub> 3G rise onset → ovulation (days) | 0.012               | 12.9 (14.7) | -3.4 (-10.0,3.3)     | 0.309   | -7.9 (-13.2,-2.7)    | 0.004   | -9.1 (-14.9,-3.3)    | 0.003   | -9.6 (-15.2,-4.0)     | 0.001   | -11.0 (-17.7,-4.2)    | 0.002   |
| Day of peak (day)                               | 0.061               | 19.9 (9.9)  | -1.9 (-7.0,3.2)      | 0.461   | -4.2 (-8.2,-0.3)     | 0.034   | -5.9 (-10.2,-1.9)    | 0.007   | -6.1 (-10.6,-1.6)     | 0.009   | -3.6 (-9.0,1.7)       | 0.179   |
| 3-Day peak mean (ng/mg cr)                      | 0.437               | 41.0 (26.4) | -10.1 (-27.3,7.1)    | 0.241   | -0.2 (-11.7,11.3)    | 0.971   | -8.9 (-22.2,4.5)     | 0.186   | 0.3 (-12.2,12.8)      | 0.959   | -12.0 (-32.3,8.3)     | 0.239   |
| Early luteal mean (ng/mg cr)                    | 0.867               | 31.5 (21.2) | -0.7 (-7.7,6.4)      | 0.845   | -1.2 (-6.8,4.5)      | 0.682   | -3.9 (-10.4,2.7)     | 0.243   | -2.0 (-8.3,4.3)       | 0.531   | -4.1 (-13.1,4.9)      | 0.366   |
| Mid luteal mean (ng/mg cr)                      | 0.404               | 24.0 (16.8) | 5.0 (-5.7,15.7)      | 0.352   | -2.5 (-11.0,6.0)     | 0.554   | -4.4 (-12.5,3.7)     | 0.276   | -5.9 (-14.4,2.5)      | 0.161   | -5.2 (-16.3,6.0)      | 0.354   |
| Late luteal mean (ng/mg cr)                     | 0.643               | 15.5 (10.1) | 2.7 (-2.0,7.4)       | 0.249   | 1.3 (-2.2,4.8)       | 0.470   | 0.9 (-2.5,4.3)       | 0.590   | 2.8 (-1.0,6.6)        | 0.140   | 2.5 (-2.1,7.1)        | 0.280   |
| 15-day mean (ng•day/mg cr)                      | 0.309               | 27.7 (17.2) | -5.8 (-11.5,0.0)     | 0.050   | -4.6 (-9.1,-0.1)     | 0.047   | -3.5 (-8.1,1.1)      | 0.137   | -3.2 (-7.9,1.5)       | 0.173   | -3.5 (-9.5,2.6)       | 0.253   |
| 28-day AUC (ng•day/mg cr)                       | 0.515               | 565 (338)   | -86 (-202, 31)       | 0.146   | -22 (-104,60)        | 0.593   | 9 (-72,90)           | 0.821   | 15 (-68,99)           | 0.714   | -38 (-137,61)         | 0.442   |
| <b>Pd3G Endpoints</b>                           |                     |             |                      |         |                      |         |                      |         |                       |         |                       |         |
| Ovulatory cycles (%)                            | 0.177               | 90.0 (30.5) | 9.90 (-2.4,22.3)     | 0.114   | 10.0 (-0.4,20.5)     | 0.06    | 10.1 (0.2,20.0)      | 0.046   | 10.0 (-0.5,20.8)      | 0.061   | 0.1 (-13.1,13.3)      | 0.984   |
| Baseline mean (µg/mg cr)                        | 0.858               | 1.30 (0.88) | 0.03 (-0.34,0.39)    | 0.883   | 0.10 (-0.19,0.40)    | 0.487   | 0.12 (-0.16,0.41)    | 0.391   | -0.06 (-0.37,0.25)    | 0.696   | 0.07 (-0.30,0.44)     | 0.695   |
| Early follicular mean (µg/mg cr)                | 0.023               | 1.52 (0.91) | 1.11 (0.38,1.85)     | 0.004   | 0.39 (-0.18,0.97)    | 0.172   | 0.12 (-0.46,0.70)    | 0.681   | -0.14 (-0.73,0.45)    | 0.636   | 0.18 (-0.46,0.82)     | 0.572   |
| Mid follicular mean (µg/mg cr)                  | 0.029               | 1.36 (0.86) | 0.44 (0.12,0.77)     | 0.009   | 0.13 (-0.14,0.40)    | 0.334   | -0.07 (-0.34,0.21)   | 0.632   | -0.08 (-0.37,0.21)    | 0.597   | 0.11 (-0.21,0.41)     | 0.503   |
| Ovulation → Pd3G rise onset (days)              | 0.608               | 1.20 (1.55) | 0.46 (-1.32,2.23)    | 0.601   | -0.41 (-1.60,0.78)   | 0.489   | 0.52 (-0.70,1.73)    | 0.386   | 0.12 (-1.08,1.33)     | 0.835   | -0.50 (-2.08,1.08)    | 0.521   |

Menstrual Cycle Function Parameters Before (Baseline) and After Bariatric Surgery (Change from Baseline). Blue shading are significant main effects, yellow shading are significant time effects without significant main effect (continued)

|                                         |         |                |                    |         |                    |         |                    |        |                    |        |                     |        |
|-----------------------------------------|---------|----------------|--------------------|---------|--------------------|---------|--------------------|--------|--------------------|--------|---------------------|--------|
| Onset of luteal rise (day)              | 0.213   | 19.5 (10.0)    | 1.5 (-5.0,7.9)     | 0.645   | -2.9 (-7.4,1.6)    | 0.202   | -4.0 (-8.7,0.7)    | 0.089  | -4.4 (-9.1,0.2)    | 0.060  | -4.8 (-11.1,1.4)    | 0.123  |
| Luteal day 0→2 rise (µg/mg cr/day)      | 0.949   | 1.00 (1.14)    | 0.37 (-0.41,1.14)  | 0.345   | 0.12 (-0.48,0.73)  | 0.688   | -0.01 (-0.65,0.63) | 0.979  | 0.14 (-0.50,0.78)  | 0.666  | 0.14 (-0.65,0.94)   | 0.717  |
| Luteal day 3→peak rise (µg/mg cr/day)   | 0.061   | 1.57 (2.09)    | -0.50 (-2.22,1.22) | 0.562   | -0.37 (-1.77,1.03) | 0.595   | 0.37 (-0.99,1.74)  | 0.582  | 0.26 (-1.21,1.72)  | 0.725  | 2.47 (0.63,4.31)    | 0.010  |
| Luteal day 5-6 mean (µg/mg cr)          | 0.078   | 11.0 (7.1)     | -2.5 (-6.3,1.3)    | 0.195   | 1.1 (-2.0,4.1)     | 0.473   | -1.3 (-4.2,1.6)    | 0.370  | -0.2 (-3.2,2.8)    | 0.895  | 3.8 (-0.2,7.8)      | 0.059  |
| Day of peak                             | 0.002   | 29.8 (8.7)     | -4.3 (-9.0,0.3)    | 0.065   | -6.7 (-10.5,-3.0)  | 0.0008  | -7.2 (-11.0,-3.3)  | 0.0005 | -6.8 (-10.7,-2.9)  | 0.0009 | -9.2 (-13.9,-4.5)   | 0.0003 |
| 3-day peak mean (µg/mg cr)              | 0.400   | 10.7 (7.2)     | -0.4 (-3.6,2.8)    | 0.817   | 2.0 (-0.6,4.6)     | 0.134   | 0.9 (-1.9,3.7)     | 0.517  | 1.9 (-0.8,4.6)     | 0.156  | 3.0 (-0.8,6.8)      | 0.114  |
| 3-day peak mean - base (µg/mg cr)       | 0.171   | 9.17 (6.94)    | -1.38 (-4.75,1.99) | 0.413   | 2.57 (-0.04,5.18)  | 0.054   | 0.86 (-1.86,3.57)  | 0.526  | 2.05 (-0.69,4.79)  | 0.138  | 2.61 (-1.07,6.30)   | 0.159  |
| Rate of late luteal drop (µg/mg cr/day) | 0.011   | -1.64 (1.04)   | 0.45 (-0.44,1.34)  | 0.314   | -0.58 (-1.27,0.11) | 0.098   | 0.34 (-0.31,1.00)  | 0.297  | -0.09 (-0.82,0.65) | 0.811  | -1.38 (-2.40,-0.35) | 0.010  |
| Pd3G peak → menses (days)               | 0.639   | 4.53 (2.29)    | 0.05 (-6.51,6.60)  | 0.988   | 1.52 (-3.66,6.70)  | 0.558   | 0.32 (-4.96,5.60)  | 0.904  | 4.10 (-1.29,9.48)  | 0.133  | 3.36 (-3.57,10.29)  | 0.335  |
| Luteal AUC 1 (µg•day/mg cr)             | 0.301   | 93.8 (63.0)    | -9.2 (-51.4,33.0)  | 0.659   | 29.8 (-0.2,59.9)   | 0.052   | 3.7 (-25.3,32.7)   | 0.796  | 20.1 (-10.0,50.2)  | 0.182  | 5.5 (-36.7,47.7)    | 0.792  |
| Luteal AUC 2 (µg•day/mg cr)             | 0.108   | 87.0 (65.1)    | -9.1 (-49.4,31.2)  | 0.647   | 34.8 (7.3,62.3)    | 0.015   | 6.3 (-21.1,33.7)   | 0.643  | 22.6 (-6.0,51.1)   | 0.117  | -2.0 (-38.3,34.3)   | 0.912  |
| Luteal AUC 3 (µg•day/mg cr)             | 0.438   | 80.0 (58.7)    | -16.9 (-63.2,29.4) | 0.462   | 26.4 (-6.6,59.3)   | 0.112   | 0.9 (-31.2,33.0)   | 0.954  | 13.7 (-19.7,47.0)  | 0.408  | 14.8 (-30.2,59.8)   | 0.506  |
| Luteal AUC 4 (µg•day/mg cr)             | 0.237   | 74.0 (60.2)    | -17.5 (-61.7,26.7) | 0.425   | 31.8 (1.6,62.0)    | 0.040   | 4.2 (-26.1,34.4)   | 0.781  | 16.7 (-14.8,48.1)  | 0.287  | 3.7 (-35.4,42.9)    | 0.846  |
| Luteal AUC 5 (µg•day/mg cr)             | 0.136   | 104 (69)       | -10 (-48,28)       | 0.589   | 25 (-3,53)         | 0.077   | 0 (-28,27)         | 0.982  | 27 (-3,56)         | 0.078  | 21 (-14,56)         | 0.226  |
| <b>E<sub>1</sub>3G: Pd3G Endpoints</b>  |         |                |                    |         |                    |         |                    |        |                    |        |                     |        |
| Peak level                              | 0.242   | 42.5 (40.2)    | -10.6 (-21.6,0.4)  | 0.058   | -3.7 (-12.6,5.1)   | 0.402   | 2.9 (-6.1,11.9)    | 0.519  | 1.0 (-8.5,10.4)    | 0.837  | -3.4 (-14.8,8.0)    | 0.548  |
| DLT level                               | 0.014   | 29.7 (22.1)    | -13.1 (-20.9,-5.4) | 0.001   | -2.8 (-9.3,3.6)    | 0.385   | -1.5 (-7.8,4.7)    | 0.621  | -0.1 (-6.8,6.6)    | 0.977  | -9.1 (-17.3,-0.9)   | 0.030  |
| Slope from peak                         | 0.858   | -11.9 (14.4)   | 2.2 (-3.2,7.6)     | 0.413   | 1.0 (-3.3,5.4)     | 0.640   | -1.2 (-5.6,3.2)    | 0.582  | 0.0 (-4.7,4.7)     | 0.999  | -0.3 (-5.7,5.1)     | 0.906  |
| Slope from DLT                          | 0.016   | -9.89 (7.81)   | 5.24 (1.81,8.68)   | 0.003   | -0.18 (-2.95,2.59) | 0.898   | 0.25 (-2.50,3.01)  | 0.856  | 0.11 (-2.73,2.95)  | 0.939  | 3.55 (0.12,6.99)    | 0.043  |
| Steepest slope                          | 0.709   | -13.16 (14.53) | 3.32 (-1.83,8.46)  | 0.202   | -0.25 (-4.38,3.89) | 0.905   | -1.11 (-5.17,2.95) | 0.585  | -0.35 (-4.71,4.02) | 0.874  | 0.50 (-4.63,5.63)   | 0.846  |
| Luteal day 5-6 level                    | 0.670   | 3.77 (5.49)    | 0.30 (-1.89,2.50)  | 0.781   | -0.95 (-2.66,0.76) | 0.270   | -0.88 (-2.58,0.82) | 0.305  | -1.06 (-2.86,0.75) | 0.246  | -1.27 (-3.55,1.02)  | 0.271  |
| Creatinine (mg/ml)                      | <0.0001 | 1.13 (0.35)    | 1.16 (0.87,1.46)   | <0.0001 | 0.94 (0.64,1.24)   | <0.0001 | 0.58 (0.27,0.89)   | 0.0004 | 0.40 (0.08,0.72)   | 0.0151 | 0.13 (-0.23,0.49)   | 0.47   |
